# Supplementary material for: Synthesis of γ-Fe2O3@SiO2@polypyrrole core/shell/shell nanospheres with flexible controllability of electromagnetic properties
Source: Royal Society of Chemistry journal article supplement (doi:10.1039/c5ra25576g), 2015-12-23
Supplement: c5ra25576g1.pdf [file c5ra25576g1.pdf]

Synthesis of  $\gamma\text{-Fe}_2\text{O}_3\text{@SiO}_2\text{@Polypyrrole}$  Core/Shell/Shell Nanospheres with Flexible  
Controllability of Electromagnetic Properties

Yajie Zhang, Zhiming Zhang, Shicong Xu, Liangmin Yu and Qunwei Tang

Supporting Information

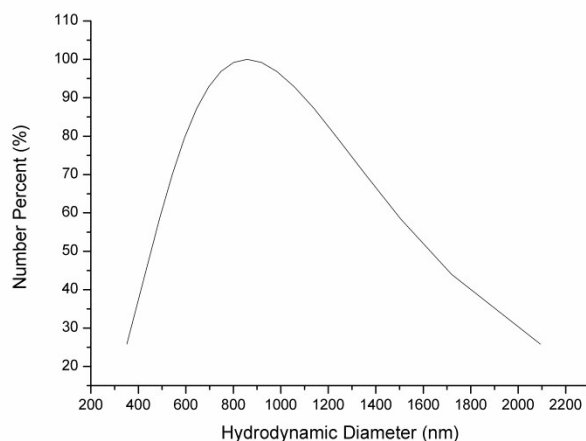

**Figure S1.** Dynamic light scattering profile of FSHP<sub>1.0-2</sub> in alcohol. The average hydrodynamic diameter is 858 nm, PDI: 0.34.

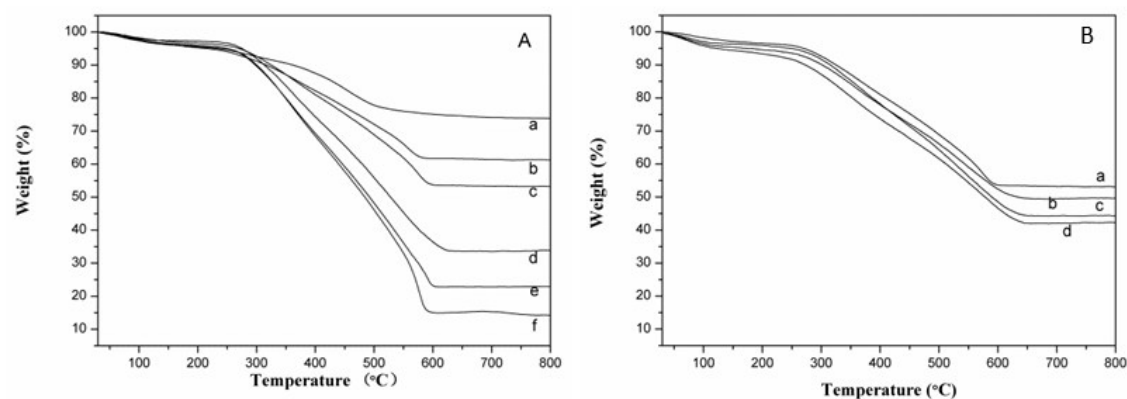

**Figure S2.** TG curves registered under air atmosphere: A: FSHP (a), and FSHP<sub>x-2</sub> samples with different FSHP dosage: FSHP<sub>1.0-2</sub> (b), FSHP<sub>0.6-2</sub> (c), FSHP<sub>0.2-2</sub> (d), FSHP<sub>0.1-2</sub> (e), FSHP<sub>0.05-2</sub> (f); B: FSHP<sub>0.6-y</sub> samples with different polymerization conditions: FSHP<sub>0.6-2</sub> (a), FSHP<sub>0.6-3</sub> (b), FSHP<sub>0.6-4</sub> (c), FSHP<sub>0.6-1</sub> (d).

**Table S1.** FSHP mass fraction of the FSHP<sub>x-2</sub> and FSHP<sub>0.6-y</sub> samples calculated by the residual mass fractions at 800 °C.

| Sample                 | Residual mass fraction (wt%) | FSHP mass fraction (wt%)* |
|------------------------|------------------------------|---------------------------|
| FSHP                   | 73.8                         | \                         |
| FSHP <sub>1.0-2</sub>  | 61.3                         | 83.1                      |
| FSHP <sub>0.6-2</sub>  | 53.2                         | 72.1                      |
| FSHP <sub>0.2-2</sub>  | 33.9                         | 45.9                      |
| FSHP <sub>0.1-2</sub>  | 23.0                         | 31.2                      |
| FSHP <sub>0.05-2</sub> | 14.2                         | 19.2                      |
| FSHP <sub>0.6-1</sub>  | 42.3                         | 57.3                      |
| FSHP <sub>0.6-3</sub>  | 49.6                         | 67.2                      |

|                       |      |      |
|-----------------------|------|------|
| FSHP <sub>0.6-4</sub> | 44.3 | 60.0 |
|-----------------------|------|------|

\* It is reasonable to consider that the residual mass at 800 °C was attributed to the residue of  $\gamma\text{-Fe}_2\text{O}_3\text{@SiO}_2$  for each sample. In other words, the residues at 800 °C are the same substance for each sample. So we propose a method to calculate the FSH mass fraction of the FSHP<sub>x-2</sub> and FSHP<sub>0.6-y</sub> samples. Here we designate the FSH mass fraction of FSHP samples as **x**, mass of FSHP as **a** g and residual mass fraction of FSH and FSHP samples at 800 °C as **b** and **c**, respectively. So there is:

$$a \cdot x \cdot b = a \cdot c$$

$$x = \frac{c}{b}$$

(b and c are given by TGA data)
